# Supplementary material
Source: PubMed Central journal article supplement (PMC6275340)
Supplement: zam024188901s1.pdf [file zam024188901s1.pdf]

1 **A novel efflux transporter, ArsK, is responsible for bacterial resistance**  
2 **to arsenite, antimonite, trivalent roxarsone and methylarsenite**

3

4 Kaixiang Shi<sup>a</sup>, Chan Li<sup>a</sup>, Christopher Rensing<sup>b,c</sup>, Xingli Dai<sup>a</sup>, Xia Fan<sup>a</sup>, Gejiao Wang<sup>a#</sup>

5

6

7 <sup>a</sup> State Key Laboratory of Agricultural Microbiology, College of Life Science and  
8 Technology, Huazhong Agricultural University, Wuhan 430070, China.

9 <sup>b</sup> Institute of Environmental Microbiology, College of Resources and Environment,  
10 Fujian Agriculture & Forestry University, Fuzhou, Fujian 350002, China.

11 <sup>c</sup> Key Laboratory of Urban Environment and Health, Institute of Urban Environment,  
12 Chinese Academy of Sciences, Xiamen, 361000, China.

13

14

15 Running Head: The novel arsenic efflux transporter ArsK

16

17

18 #Address correspondence to Gejiao Wang, [gejiao@mail.hzau.edu.cn](mailto:gejiao@mail.hzau.edu.cn), State Key  
19 Laboratory of Agricultural Microbiology, Huazhong Agricultural University, Wuhan  
20 430070, China. Phone: 86-27-87281261.

21

22

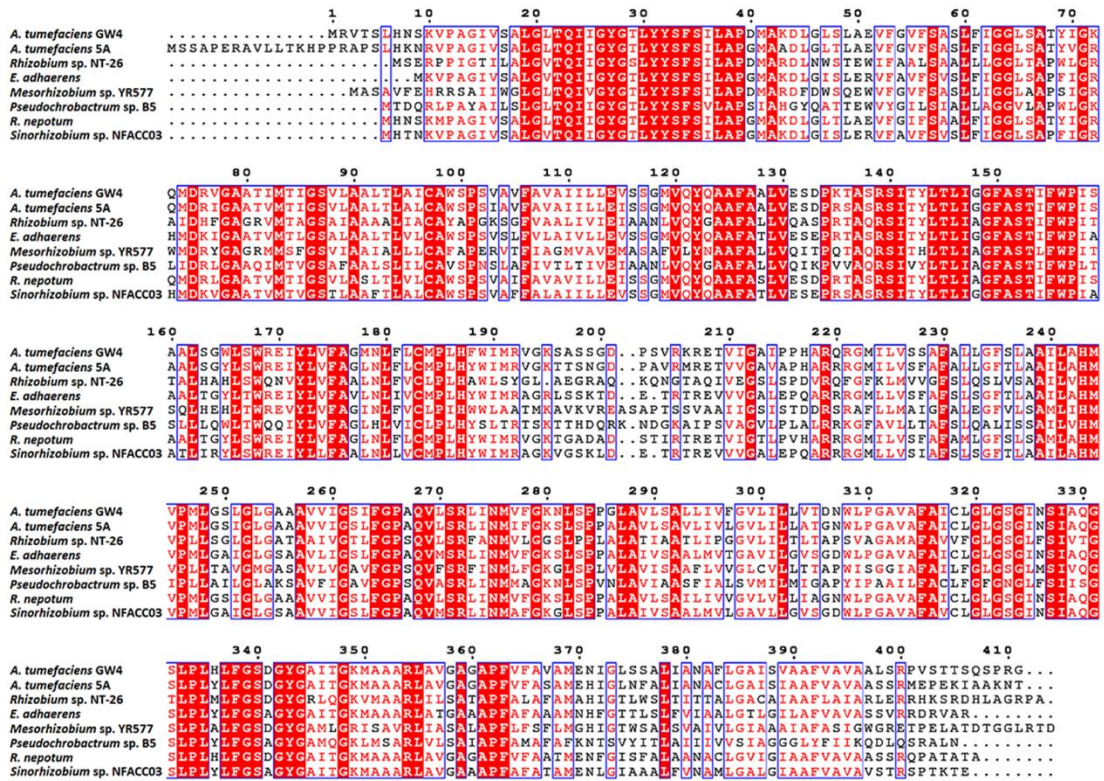

23

24 **Figure S1. Multiple alignment of ArsK sequences.** The protein sequence of ArsK  
 25 from *Agrobacterium tumefaciens* GW4 (KDR86814) is compared with ArsK sequences  
 26 from *Agrobacterium tumefaciens* 5A (WP\_080581087), *Rhizobium* sp. NT-26  
 27 (WP\_052642607), *Ensifer adhaerens* (WP\_034801600), *Mesorhizobium* sp. YR577  
 28 (WP\_091917949), *Pseudochrobactrum* sp. B5 (WP\_075657088), *Rhizobium nepotum*  
 29 (WP\_045020795) and *Sinorhizobium* sp. NFACC03 (WP\_093232735). The multiple  
 30 alignment was calculated with Clustal Omega and ESPrnt 3.0.

31

32

33

34

35

```

1      10      20      30      40      50      60
WP_020810055 M E E R Q A L I S F A A L S Q E T R L A I V R A L V I A G P E G M A A G A I A E R M G V S A T N V S F H L K E L E R S R
WP_059754788 M E E R Q A L I S F A A L S Q E T R L A I I R A L V I A G P K G M A A G A I A E R M G V S A T N V S F H L K E L E R S G
WP_111793746 M E E R Q A L I S F A A L S Q E T R L A I I R A L V I A G P K G M A A G A I A E R M G V S A T N V S F H L K E L E R S G
WP_072379893 M D E R Q A L I S F A A L S Q E T R L A I V R A L V I A G P E G L A A G V I A E R M G V S A T N V S F H L K E L E R S G
ASK43079      M D E R Q A L I S F A A L S Q E T R L A I V R A L V I A G P D G L A A G V I A E R M G V S A T N V S F H L K E L E R S G
WP_099057160 M D E R Q A L I S F A A L S Q E T R L A I V R A L V I A G P E G L A A G V I A E R M G V S A T N V S F H L K E L E R S G
WP_112534859 M D E R Q A L S F A A L S Q E T R L A I V R A L V I A G P E G L A A G V I A E R M G V S A T N V S F H L K E L E R S G

70      80      90      100     110
WP_020810055 L I S Q R R E S R S I I Y S A S Y D A L A A L V K F L M E D C C A G H P T V R E N V E R S D G C C V P A N E G D V V A
WP_059754788 L I S Q R R E S R S I I Y S A S Y D A L A D L V K F L M E D C C A G H P T V R E N V E R S D G C C I K A K K G D D V A
WP_111793746 L I S Q R R E S R S I I Y S A R Y D A L A D L V K F L M E D C C A G H P T V R E N I E R S D G C C I R A K K G D D V A
WP_072379893 L I S Q R R E S R S I I Y S A S Y E T L A D L V K F L M E D C C A G H P T I R E N V E R G D D C C S P A K K G D V V A
ASK43079      L I S Q R R K S R S I I Y S A S Y D A L A D L V K F L M E D C C A G H P A I R E N V E R A D D C C I P A D K G D V V A
WP_099057160 L I S Q R R E S R S I I Y S A S Y D A L A D L V K F L M E D C C V G H P A I R K N V E S A D D C C I P A D K G D V I A
WP_112534859 L I S Q R R E S R S I I Y S A S Y E A L A D L V K F L M E D C C A G H P V I R E N V E R A D D C C I P A A K G D V V A

```

36

37 **Figure S2. Multiple alignment of ArsR2 sequences.** The protein sequence of ArsR2  
38 from *Agrobacterium tumefaciens* GW4 (WP\_020810055, this study) was compared  
39 with ArsR sequences from *Agrobacterium* sp. D14 (WP\_059754788), Rhizobiales  
40 bacterium (WP\_111793746), *Rhizobium tibeticum* (WP\_072379893), *Agrobacterium*  
41 sp. 7 (ASK43079), *Rhizobium* sp. ACO-34A (WP\_099057160) and Rhizobiales  
42 bacterium (WP\_112534859). The multiple alignment was calculated with Clustal  
43 Omega and ESPrpt 3.0.

44

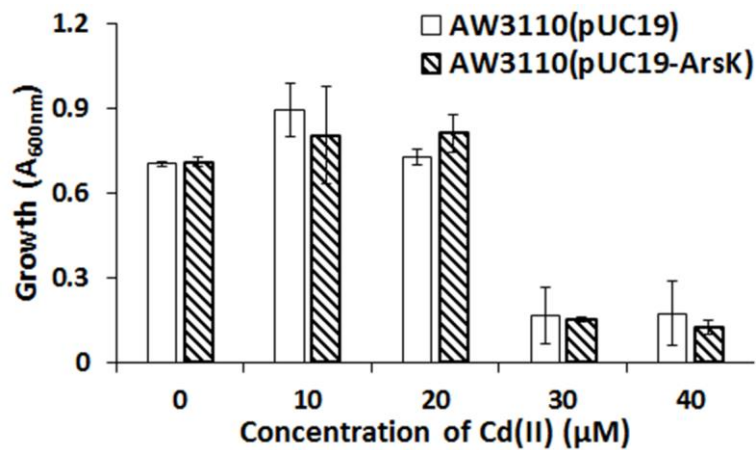

45

46 **Figure S3. The resistance of strains AW3110 (pUC19) and AW3110 (pUC19-ArsK)**  
47 **to Cd(II).** The data are shown as the means of three replicates.

48

49

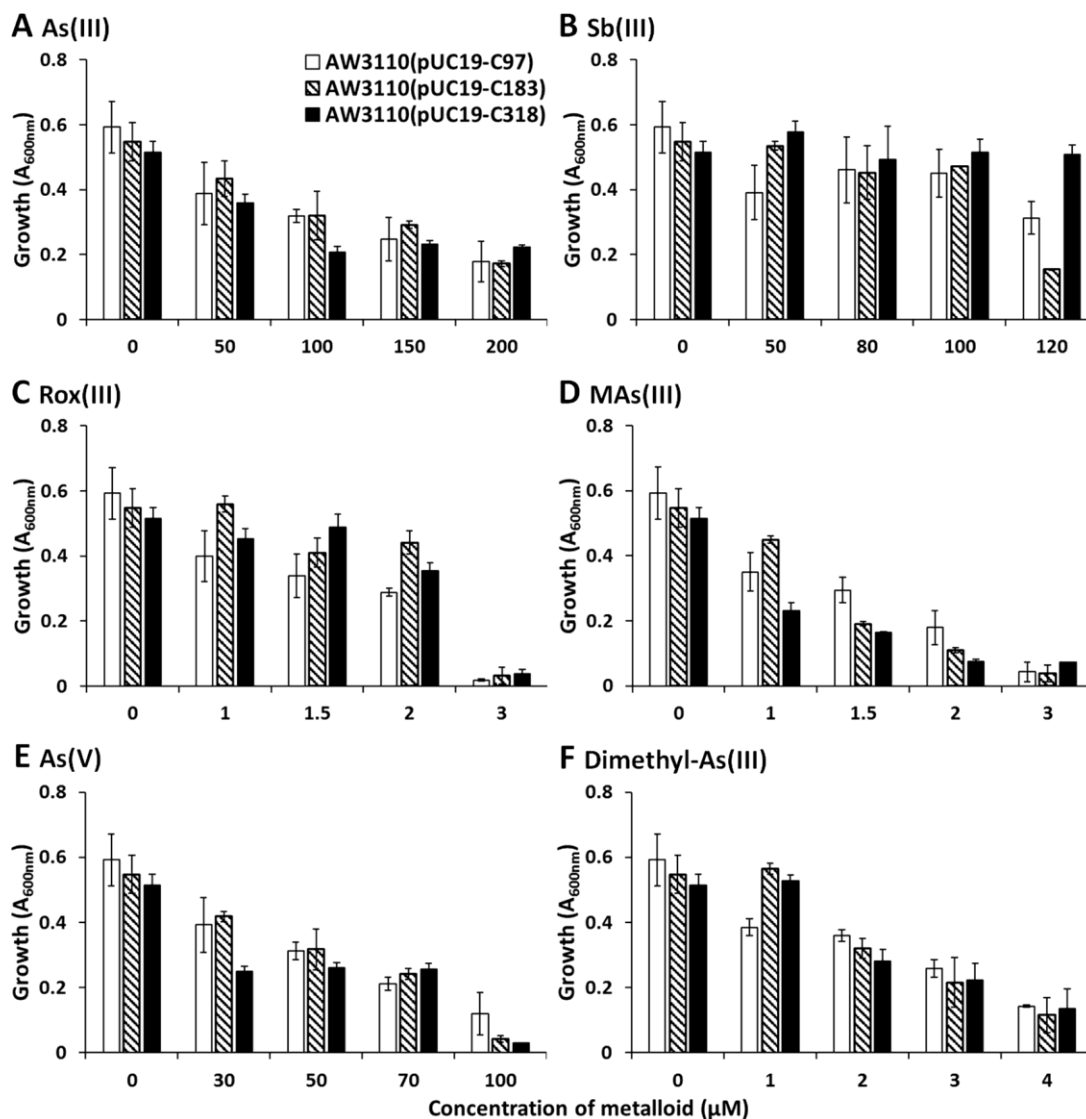

50

51 **Figure S4. The resistance of several ArsK mutant strains to As(III), Sb(III),**  
 52 **Rox(III), MAs(III), As(V) and Dimethyl-As(III).** Growth of strains were measured  
 53 with the addition of different amounts of As(III) (A), Sb(III) (B), Rox(III) (C), MAs(III)  
 54 (D), As(V) (E) and Dimethyl-As(III) (F). The curves of AW3110 (pUC19) and AW3110  
 55 (pUC19-ArsK) in Figure 3 could be the negative and positive control. The data are  
 56 shown as the means of three replicates.
